# Supplementary material
Source: HighWire-hosted journal article supplement (https://jama.ama-assn.org/content/suppl/2008/12/10/300.14.1718)
Supplement: pdfpat100808.pdf [file pdfpat100808.pdf]

# Tromboflebitis

En las arterias o en las venas, pueden formarse coágulos de sangre. La inflamación en una vena debido a un coágulo de sangre se denomina **tromboflebitis**. Por lo general, la tromboflebitis se produce en las venas de las piernas. En raras ocasiones, puede presentarse en las venas de los brazos o del cuello. La tromboflebitis **superficial** (cerca de la superficie) se produce en las venas que son visibles justo debajo de la piel. Por lo general, la zona de la inflamación se enrojece, está sensible y caliente al tacto, y puede sentirse dolor. Se puede inflamar la pierna o el brazo, y se puede experimentar fiebre. La **trombosis venosa profunda (deep venous thrombosis, DVT)** es más peligrosa que la tromboflebitis superficial. Por lo general, la trombosis venosa profunda no puede verse ni sentirse. La hinchazón de la pierna o del brazo, o la fiebre pueden alertar a una persona sobre la presencia de DVT, especialmente si existen factores de riesgo de DVT. La **embolia pulmonar**, una condición que puede ser mortal, se produce por la DVT que se desprende en el sistema venoso y se traslada a los pulmones. Allí, el coágulo de sangre bloquea el flujo sanguíneo adecuado a los pulmones y disminuye los niveles de oxígeno en el cuerpo. El número de JAMA del 8 de octubre de 2008 incluye un artículo acerca de las pruebas diagnósticas para detectar la DVT. Esta Hoja para el Paciente surge de otra publicada anteriormente en el número de JAMA del 26 de julio de 2006.

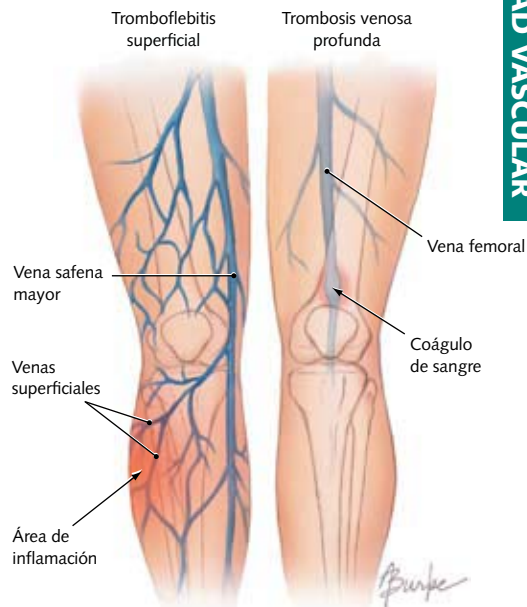

## FACTORES DE RIESGO

- Inactividad debida a lesión reciente, cirugía o por permanecer mucho tiempo en posición sentada
- Embarazo o parto reciente
- Uso de anticonceptivos orales o de terapia con estrógeno
- Cáncer
- Accidente cerebrovascular u otras enfermedades que limitan el movimiento
- Antecedentes familiares de trastornos de coagulación
- Catéteres venosos centrales (se utilizan para la inyección de medicamentos o para diálisis)

## SÍNTOMAS

Además de la historia clínica y del examen físico, el médico puede solicitar la realización de pruebas para evaluar la tromboflebitis superficial o para detectar la presencia de DVT. Estas pruebas pueden incluir **ultrasonido** (uso de ondas sonoras para buscar un coágulo de sangre en una vena), tomografía computada (computed tomography, CT) o resonancia magnética (magnetic resonance imaging, MRI) para visualizar los vasos sanguíneos, análisis de sangre, o una **venografía** (utilizando la inyección de un colorante para seguir el recorrido de una vena).

## PREVENCIÓN

- Mueva las piernas, especialmente si pasa mucho tiempo sentado o en cama
- Use medias de compresión (sostén fuerte)
- Analice sus antecedentes personales y familiares con su médico antes de utilizar terapia hormonal

## TRATAMIENTO

Por lo general, el tratamiento para la tromboflebitis superficial incluye levantar las piernas, aplicar compresas calientes en la zona, y administrar medicamentos para reducir el dolor y la inflamación. Pueden usarse medias de sostén para reducir la hinchazón. Por lo general, el tratamiento para la DVT o la embolia pulmonar incluye tratamiento de **anticoagulación** (con anticoagulantes) con **heparina** (por inyección) o **warfarina** (por boca, para un tratamiento a largo plazo). Las mujeres embarazadas no deben recibir warfarina porque puede dañar al feto.

## PARA OBTENER MÁS INFORMACIÓN

- National Heart, Lung, and Blood Institute (Instituto Nacional del Corazón, los Pulmones y la Sangre)  
[www.nhlbi.nih.gov](http://www.nhlbi.nih.gov)
- American Heart Association (Asociación Americana del Corazón)  
[www.americanheart.org](http://www.americanheart.org)

## INFÓRMESE

Para encontrar esta y otras Hojas para el Paciente de JAMA anteriores, vaya al índice de Patient Page (Hoja para el Paciente) del sitio web de JAMA en [www.jama.com](http://www.jama.com). Muchas se encuentran disponibles en inglés, español y francés. En los números del 3 de diciembre de 2003 y del 14 de febrero de 2001, se publicaron Hojas para el Paciente sobre embolia pulmonar.

Fuentes: National Heart, Lung, and Blood Institute; American Heart Association

Janet M. Torpy, MD, Redactora

Alison E. Burke, MA, Ilustradora

Richard M. Glass, MD, Editor

La Hoja para el Paciente de JAMA es un servicio al público de JAMA. La información y las recomendaciones que aparecen en esta hoja son adecuadas en la mayoría de los casos, pero no reemplazan el diagnóstico médico. Para obtener información específica relacionada con su afección médica personal, JAMA le sugiere que consulte a su médico. Los médicos y otros profesionales de atención médica pueden fotocopiar esta hoja con fines no comerciales, para compartirla con los pacientes. Para comprar reimpresiones en grandes cantidades, llame al 312/464-0776.

**JAMA**  
COPIA PARA  
SUS PACIENTES
